# Supplementary material
Source: MDPI journal article supplement (https://www.mdpi.com/2410-3888/8/1/44)
Supplement: s1 [file s1]

**Supplemental Table S1 Summary of isotopic data from the literature from studies performed in  
Puerto Rico and other similar shallow reef systems.**

| Type of Material    | Lowest Taxon ID/<br>Species  | Common name                     | δ13C   | δ15N | Location                          | Source                    |
|---------------------|------------------------------|---------------------------------|--------|------|-----------------------------------|---------------------------|
| Juvenile prawns     | variety                      | Shrimp near seagrasses          | -19    | 7.5  | Gulf of Carpentaria,<br>Australia | Loneragan et al. 1997     |
| mangrove            | <i>Rhizophora stylosa</i>    |                                 | -28    | 3.01 |                                   |                           |
| mangrove            | <i>Ceriops</i>               |                                 | -27.4  | 2.3  |                                   |                           |
| seagrass            | <i>Enhalus acoroides</i>     |                                 | -9.55  | 1.12 |                                   |                           |
| seagrass            | <i>Halodule uninervis</i>    |                                 | -12.1  | 3    |                                   |                           |
| seagrass            | <i>Halophila ovalis</i>      |                                 | -10.7  | 3.1  |                                   |                           |
| seagrass            |                              | Epiphytes                       | -13.3  | 2.4  |                                   |                           |
| epiphytes           |                              |                                 |        |      |                                   |                           |
| macroalgae          | <i>Caulerpa</i>              |                                 | -21.55 | 1    |                                   |                           |
| Seston              |                              | Seston                          | -20.07 | 5.77 |                                   |                           |
| mangrove            | <i>Laguncularia racemosa</i> | white mangrove                  | -26.4  | 0.6  | Florida                           | Wooler et al. 2003        |
| mangrove            | <i>Laguncularia racemosa</i> | white mangrove                  | -27.4  | 0.3  | Twin Cays, Belize                 |                           |
| mangrove            | <i>Laguncularia racemosa</i> | white mangrove                  | -26.6  | 11.4 | Man of War, Belize                |                           |
| mangrove            | <i>Laguncularia racemosa</i> | white mangrove                  | -26.5  | 12.3 | Man of War, Belize                |                           |
| mangrove            | <i>Avicennia germinans</i>   | black mangrove                  | -27.3  | 20.2 | Man of War, Belize                |                           |
| mangrove            | <i>Rhizophora mangel</i>     | Red mangrove                    | -27.2  | 9.1  | Man of War, Belize                |                           |
| seagrass            | Seagrass                     |                                 | -7.8   | 1.13 | Twin Cays, Belize                 |                           |
| seagrass            | <i>Thalassia</i> sp.         | turtle grass                    | -7.3   | 2.6  | Twin Cays, Belize                 |                           |
| macroalgae          | <i>Ulva</i> sp.              | Ulva                            | -12.2  | 6.1  | Man of War, Belize                |                           |
| macroalgae          | <i>Sargassum</i> sp.         |                                 | -14.1  | 2    | Twin Cays, Belize                 |                           |
| macroalgae          | <i>Halimeda</i> sp.          |                                 | -13.1  | 2    | Twin Cays, Belize                 |                           |
|                     | Microbial mat                |                                 | -22.6  | 0.4  | Twin Cays, Belize                 |                           |
|                     |                              | Fiddler crabs                   | -21    | 3.9  | Laguna Joyuda, Puerto Rico        | France, 1998              |
| mangrove            | <i>Rhizophora mangel</i>     | Red mangrove - green leaves     | -29.9  | 4.2  | Laguna Joyuda, Puerto Rico        |                           |
| mangrove            | <i>Rhizophora mangel</i>     | Red mangrove - biofilmed leaves | -28.9  | 3.4  | Laguna Joyuda, Puerto Rico        |                           |
| seagrass            |                              |                                 | -14.1  | 3.2  | Laguna Joyuda, Puerto Rico        |                           |
| plankton            |                              |                                 | -25.8  | 6.3  | Laguna Joyuda, Puerto Rico        |                           |
| macroalgae          |                              |                                 | -19.9  | 6.3  | Laguna Joyuda, Puerto Rico        |                           |
| micro-algae         |                              |                                 | -19.9  | 2.2  | Laguna Joyuda, Puerto Rico        |                           |
| littoral sediment   |                              |                                 | -26.9  | 1.5  |                                   |                           |
| invertebrate tissue |                              | Fiddler crabs                   | -23    |      | Laguna Joyuda, Puerto Rico        | Stoner & Zimmerman (1988) |
|                     |                              | polychaetes                     | -21.7  |      | Laguna Joyuda, Puerto Rico        |                           |
|                     |                              | molluscs                        | -19.7  |      | Laguna Joyuda, Puerto Rico        |                           |
|                     |                              | crustaceans                     | -16.5  |      | Laguna Joyuda, Puerto Rico        |                           |
| mangrove            | <i>Rhizophora mangel</i>     | Red mangrove - green leaves     | -29.2  |      | Laguna Joyuda, Puerto Rico        |                           |
| mangrove            | <i>Rhizophora mangel</i>     | Red mangrove - biofilmed leaves | -27.3  |      | Laguna Joyuda, Puerto Rico        |                           |

|                   |                                |                      |        |       |                            |                    |
|-------------------|--------------------------------|----------------------|--------|-------|----------------------------|--------------------|
| seagrass          | <i>Thalassia testudinum</i>    |                      | -16.1  |       | Laguna Joyuda, Puerto Rico |                    |
| macroalgae        | <i>Caulerpa sertularioides</i> |                      | -20.2  |       | Laguna Joyuda, Puerto Rico |                    |
| microalgae        | <i>Spirulina sp.</i>           | blue-green algae     | -14.2  |       | Laguna Joyuda, Puerto Rico |                    |
| littoral sediment |                                |                      | -23.9  |       | Laguna Joyuda, Puerto Rico |                    |
| fish              | <i>Lutjanus jocu</i>           | dog snapper          | -16.05 | 10.85 | Belize (dry season)        | Wetmore 2014       |
| fish              | <i>L. griseus</i>              | gray snapper         | -15.8  | 10.7  | Belize (dry season)        |                    |
| fish              | <i>L. apodus</i>               | schoolmaster         | -14.6  | 10.4  | Belize (dry season)        |                    |
| seagrass          |                                | seagrass             | -7.67  | 2.32  | Belize (dry season)        |                    |
| mangrove          |                                | mangrove             | -29    | 1.45  | Belize (dry season)        |                    |
| phytoplankton     |                                | PMA                  | -21.77 | 2.15  | Belize (dry season)        |                    |
| phytoplankton     |                                | BMA                  | -10.22 | 1.7   | Belize (dry season)        |                    |
| phytoplankton     | <i>Trichodesmium</i>           | POM                  | -14    | 1     | Gulf of Mexico             | Dorado et al. 2012 |
| phytoplankton     |                                | POM                  | -22.2  | 4.2   | neritic                    |                    |
| phytoplankton     |                                | POM                  | -17    | 0.5   | oceanic                    |                    |
| macroalgae        | <i>Chaetomorpha sp.</i>        | green filamentous    | -19.8  | 2.3   | Guánica Biosphere Reserve  | present study      |
| macroalgae        | <i>Caulerpa sertularioides</i> | feathery green       | -19.1  | 2.7   | Guánica Biosphere Reserve  |                    |
| macroalgae        | <i>Ulva lactuca</i>            | green flat           | -18    | 4.4   | Guánica Biosphere Reserve  |                    |
| macroalgae        | <i>Cladomorpha sp.</i>         | green filamentous    | -14.8  | 2.7   | Guánica Biosphere Reserve  |                    |
| macroalgae        | <i>Avrainvillea sp.</i>        | green fan algae      | -8.1   | 0.7   | Guánica Biosphere Reserve  |                    |
| macroalgae        | <i>Dictyota sp.</i>            | brown                | -14.3  | 2.4   | Guánica Biosphere Reserve  |                    |
| macroalgae        | <i>Chondrus sp.</i>            | brown                | -15.9  | 2.8   | Guánica Biosphere Reserve  |                    |
| macroalgae        | <i>Padina sp.</i>              | brown                | -8.5   | 2.9   | Guánica Biosphere Reserve  |                    |
| macroalgae        | <i>Ecotocarpus sp.</i>         | feathery red seaweed | -17.6  | 2.9   | Guánica Biosphere Reserve  |                    |
| invertebrate      | <i>Brachycarpus sp.</i>        | commensal shrimp     | -16.9  | 6.5   | Guánica Biosphere Reserve  |                    |
| invertebrate      | <i>Lysmata sp.</i>             | peppermint shrimp    | -14.7  | 8     | Guánica Biosphere Reserve  |                    |
| invertebrate      | <i>Pelia sp.</i>               | teardrop crab        | -13.9  | 5.9   | Guánica Biosphere Reserve  |                    |
| invertebrate      | <i>Calappa sp.</i>             | box crab             | -12.4  | 5.9   | Guánica Biosphere Reserve  |                    |
| invertebrate      | <i>Petrolisthes sp.</i>        | porcelain crab       | -12.9  | 6.2   | Guánica Biosphere Reserve  |                    |
| invertebrate      | <i>Holothuroidea sp.</i>       | sea cucumber         | -9.9   | 6.6   | Guánica Biosphere Reserve  |                    |
| invertebrate      | <i>Ophiuroidea sp.</i>         | brittlestar          | -6.9   | 8.53  | Guánica Biosphere Reserve  |                    |
